# Supplementary material for: Diagnostic Value of CK-18, FGF-21, and Related Biomarker Panel in Nonalcoholic Fatty Liver Disease: A Systematic Review and Meta-Analysis
Source: Hindawi journal article supplement (doi:10.1155/2017/9729107), 2017-01-01
Supplement: f1 [file 9729107.f1.pdf]

Supplementary Material is composed of Figure S1-S7 and Table S1-S5, all of them may be found in the online version of this article.

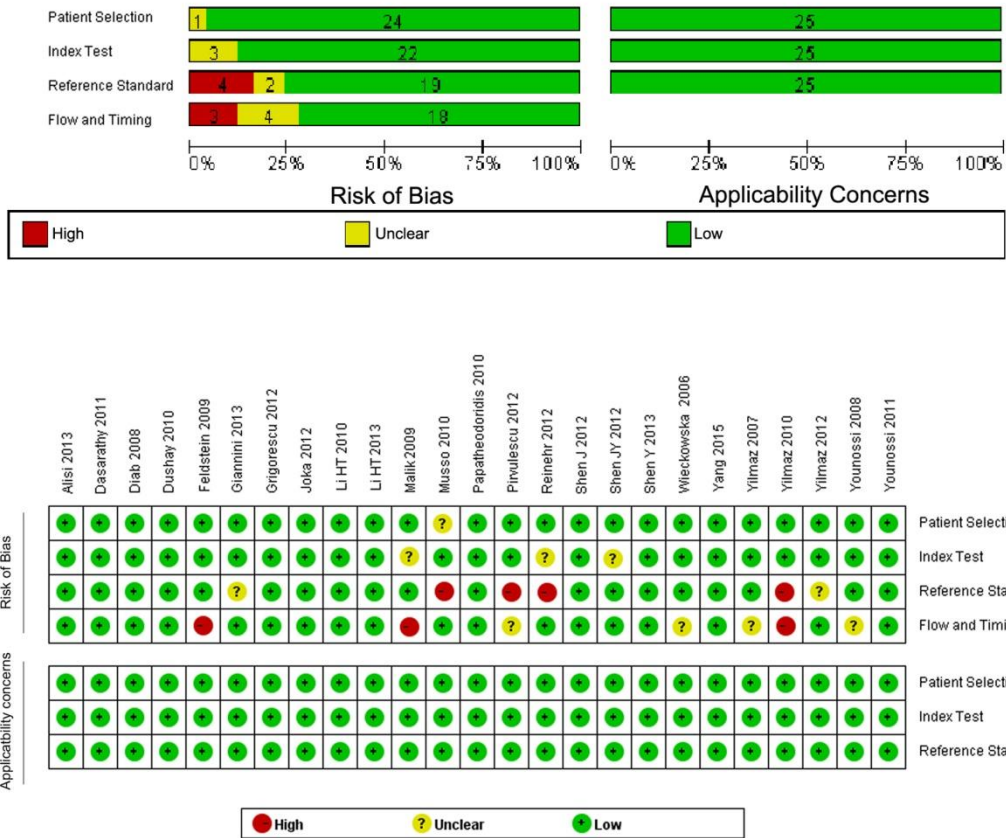

**Figure S1** Methodology quality evaluated according to Quality Assessment of Studies of Diagnostic Accuracy (QUADAS-2).

a

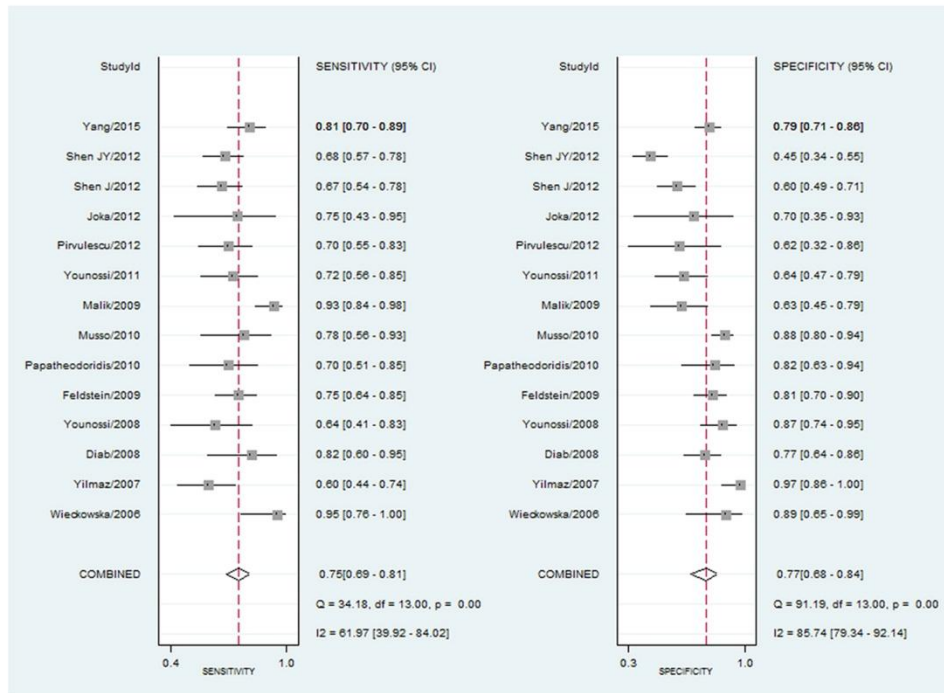

b

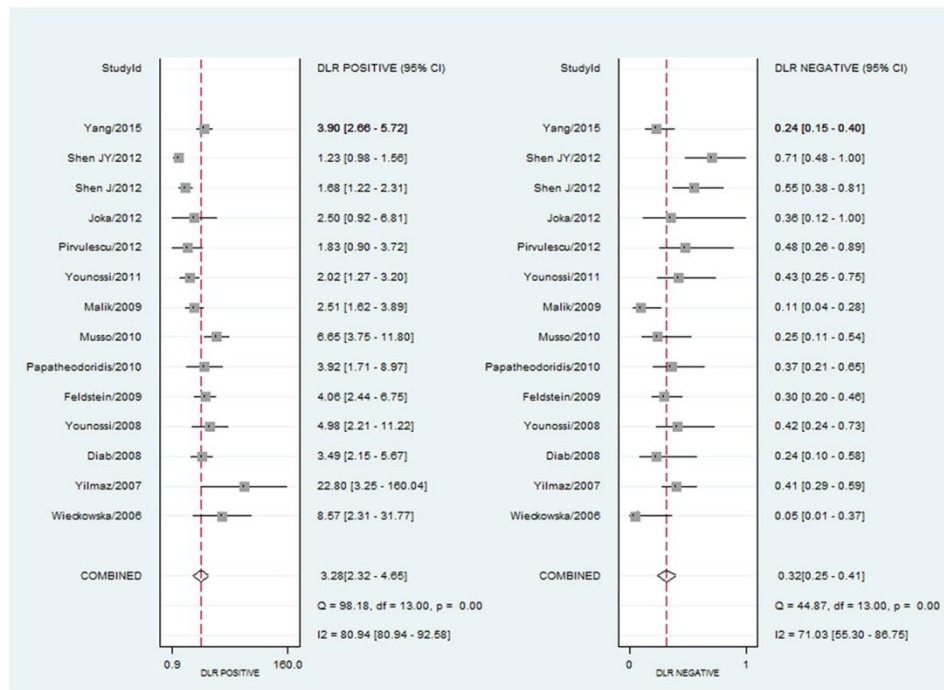

**Figure S2** Combined sensitivity, specificity (a) and DLR positive, DLR negative (b) of CK-18, M30 fragment.

DLR, diagnostic likelihood ratio; CI, confidence interval.

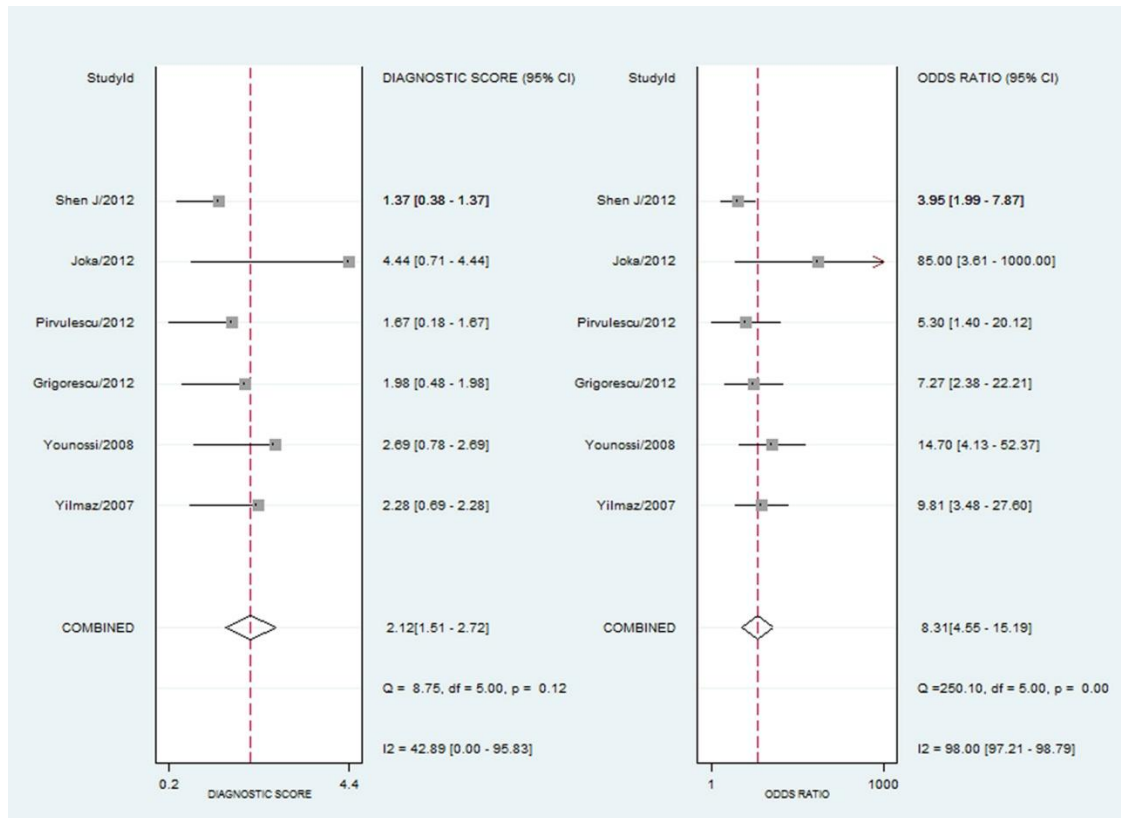

**Figure S3** Combined DS and DOR of CK-18, M65 fragment.

DS, diagnostic score. DOR, diagnostic odds ratio. CI, confidence interval.

a

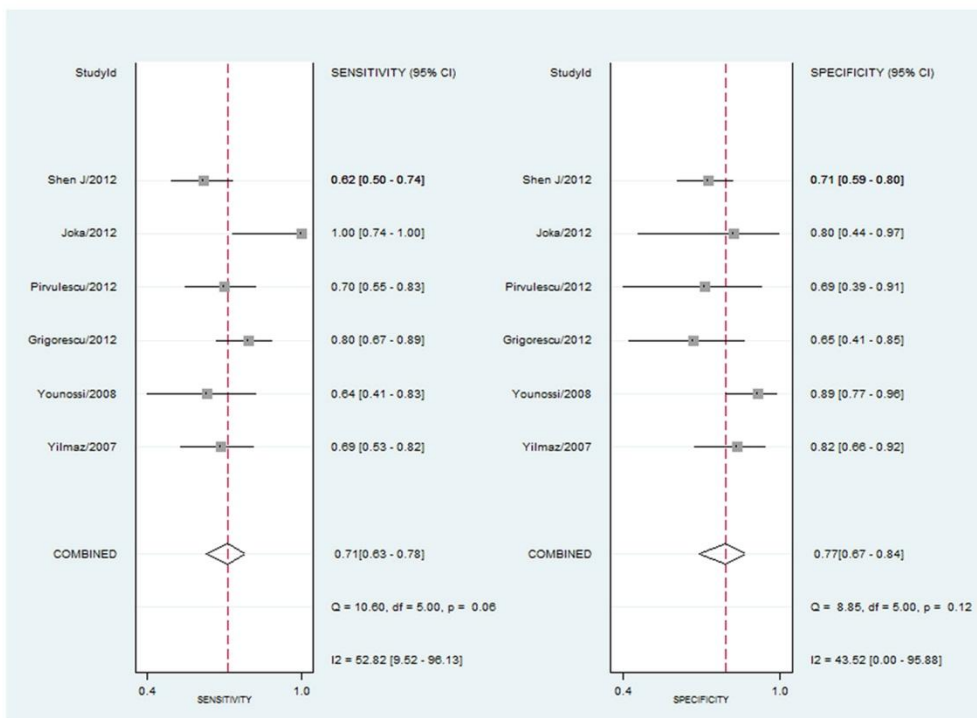

b

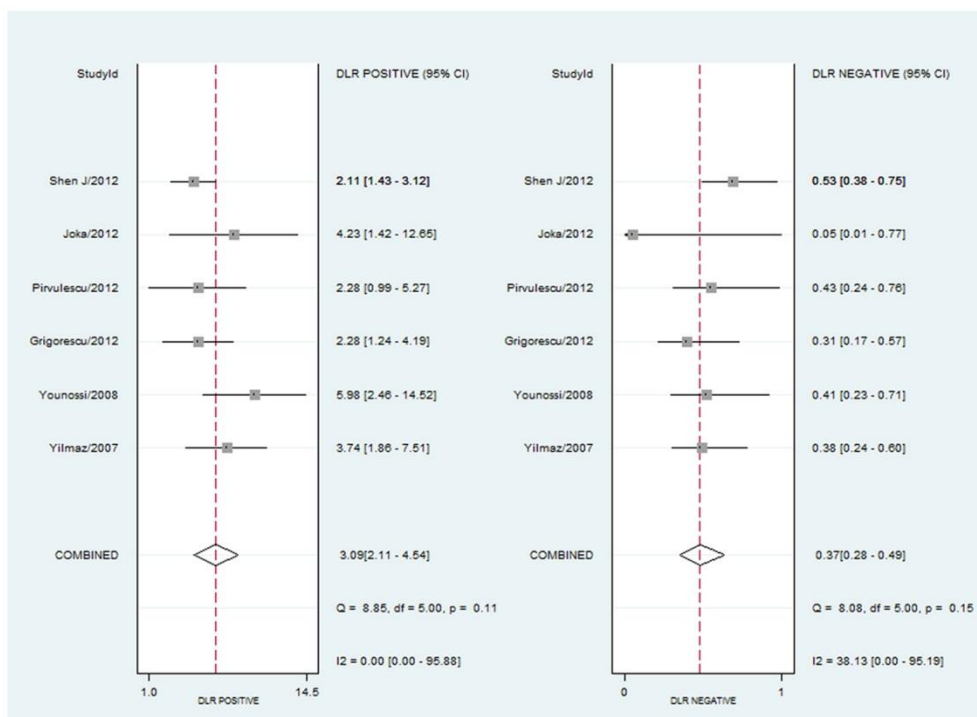

**Figure S4** Combined sensitivity, specificity (a) and DLR positive, DLR negative (b) of CK-18, M65 fragment.

DLR, diagnostic likelihood ratio; CI, confidence interval.

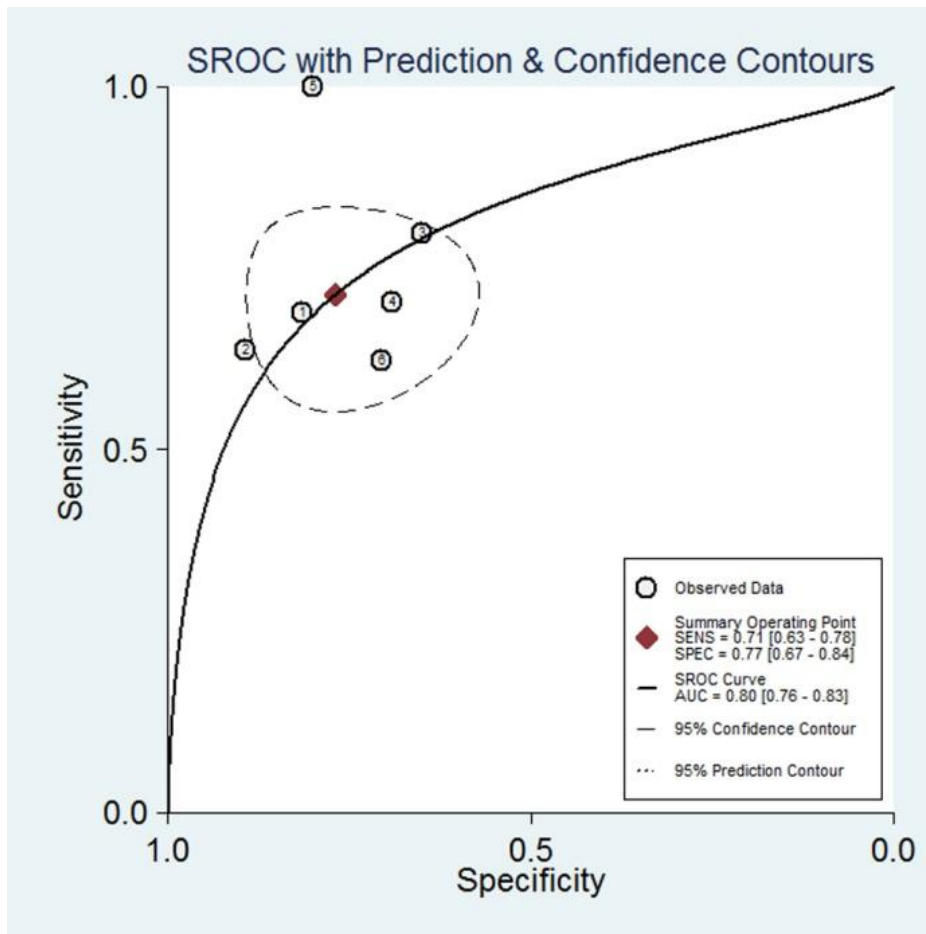

**Figure S5** Summary receiver's operative characteristics (SROC) of CK-18, M65 fragment. AUC, area under the curve. SENS, sensitivity. SPEC, specificity.

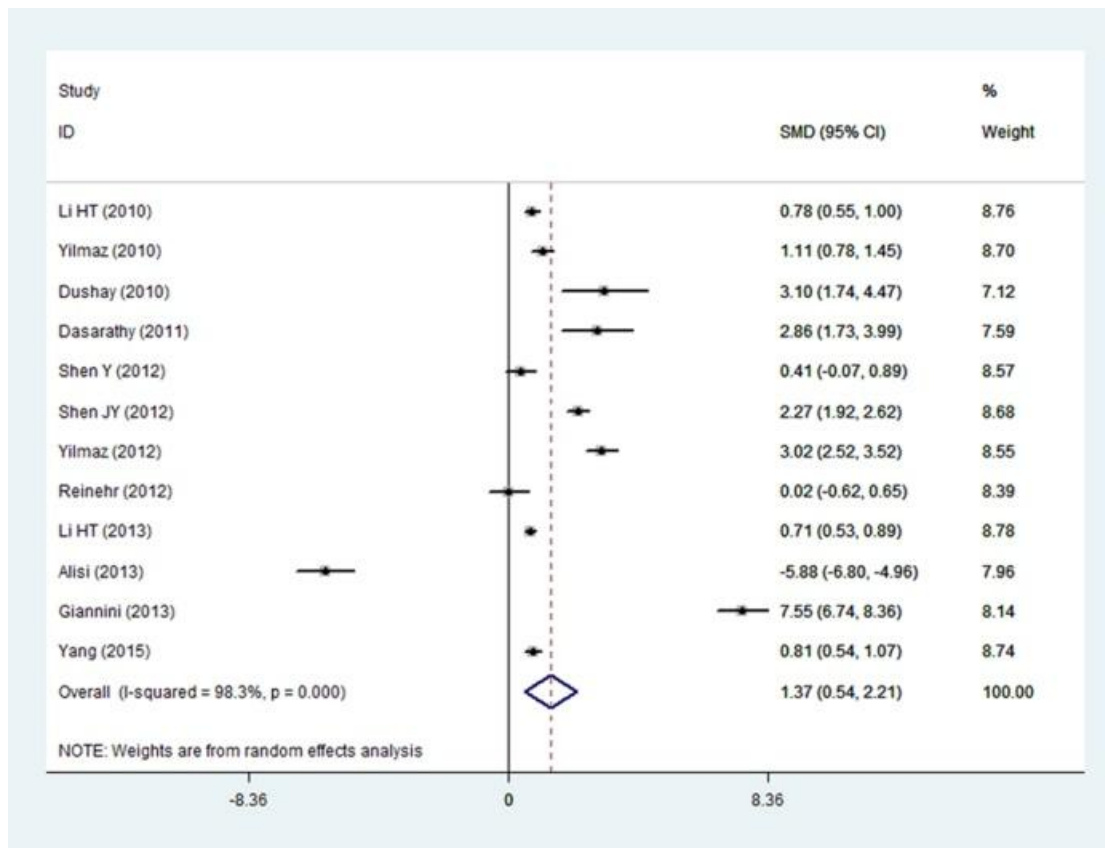

**Figure S6** Forest plots showing SMD in FGF-21 concentration between the patients with NAFLD (simple steatosis and NASH) and normal people in all studies reporting data as continuous variables.

Negative values indicate lower concentrations. Positive values indicate higher concentrations prior to NAFLD. SMD, standardised mean differences.

a

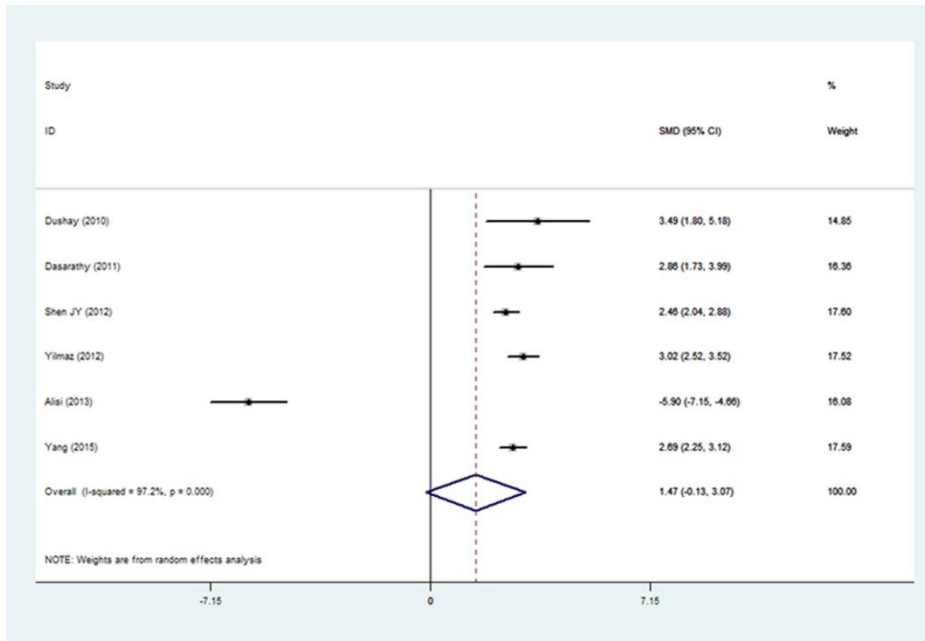

b

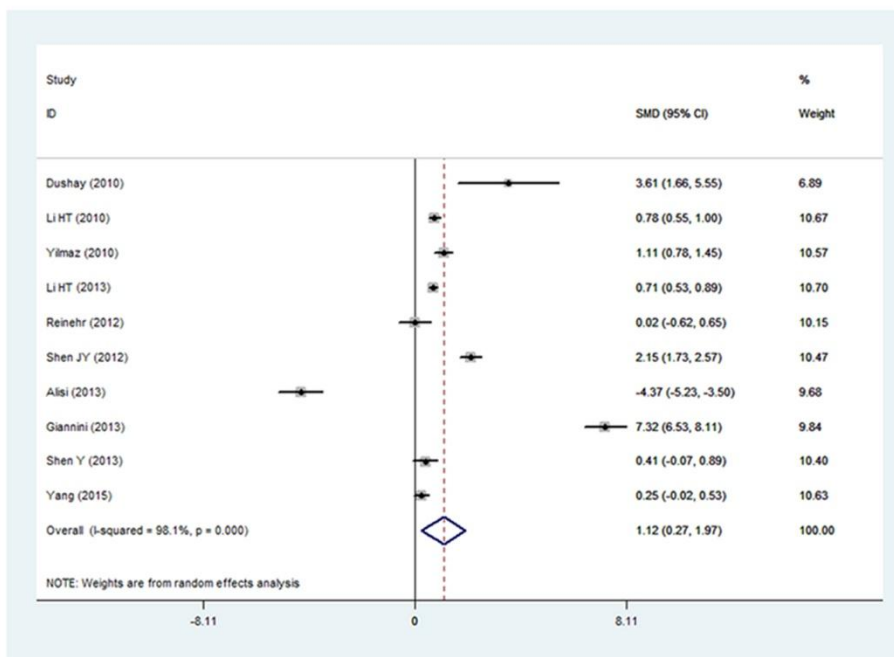

**Figure S7** SMD of FGF-21 concentration in subgroups including NASH vs. normal control (a) and simple steatosis vs. normal control (b).

Negative values indicate lower concentrations. Positive values indicate higher concentrations prior to NASH or simple steatosis. SMD, standardised mean differences.

**Table S1** Overview of 14 studies on CK-18 fragment M30 reporting the results in accuracy of diagnosis

| <b>Study (y)</b>                             | <b>Cut-off</b> | <b>Sensitivity<br/>(95% CI)</b> | <b>Specificity<br/>(95% CI)</b> | <b>PLR<br/>(95% CI)</b> | <b>NLR<br/>(95% CI)</b> | <b>AUROC<br/>(95% CI)</b> |
|----------------------------------------------|----------------|---------------------------------|---------------------------------|-------------------------|-------------------------|---------------------------|
| Wieckowska et al <sup>11</sup><br>(2006)     | 380.2 U/L      | 0.95<br>(0.76-1.00)             | 0.89<br>(0.65-0.99)             | 8.57<br>(2.31-31.77)    | 0.05<br>(0.01-0.37)     | 0.93<br>(NA)              |
| Yilmaz et al <sup>12</sup><br>(2007)         | 121.6 U/L      | 0.60<br>(0.44-0.74)             | 0.97<br>(0.86-1.00)             | 22.80<br>(3.25-160.04)  | 0.41<br>(0.29-0.59)     | 0.73<br>(0.62-0.82)       |
| Diab et al <sup>13</sup><br>(2008)           | 252 U/L        | 0.82<br>(0.60-0.95)             | 0.77<br>(0.64-0.86)             | 3.49<br>(2.15-5.67)     | 0.24<br>(0.10-0.58)     | 0.88<br>(0.77-0.99)       |
| Feldstein et al <sup>14</sup><br>(2009)      | 246 U/L        | 0.75<br>(0.64-0.85)             | 0.81<br>(0.70-0.90)             | 4.06<br>(2.44-6.75)     | 0.30<br>(0.20-0.46)     | 0.83<br>(0.75-0.91)       |
| Papatheodridis et al <sup>15</sup><br>(2010) | 225 U/L        | 0.70<br>(0.51-0.85)             | 0.82<br>(0.63-0.94)             | 3.92<br>(1.71-8.97)     | 0.37<br>(0.21-0.65)     | 0.87<br>(0.79-0.96)       |
| Musso et al <sup>16</sup><br>(2010)          | 246 U/L        | 0.78<br>(0.56-0.93)             | 0.88<br>(0.80-0.94)             | 6.65<br>(3.75-11.80)    | 0.25<br>(0.11-0.54)     | 0.83<br>(0.80-0.90)       |
| Malik et al <sup>17</sup><br>(2009)          | 300 U/L        | 0.93<br>(0.84-0.98)             | 0.63<br>(0.45-0.79)             | 2.51<br>(1.62-3.89)     | 0.11<br>(0.04-0.28)     | 0.80<br>(0.76-0.84)       |
| Shen J et al <sup>18</sup><br>(2012)         | 338 U/L        | 0.67<br>(0.54-0.78)             | 0.60<br>(0.49-0.71)             | 1.68<br>(1.22-2.31)     | 0.55<br>(0.38-0.81)     | 0.66<br>(0.57-0.75)       |
| Joka et al <sup>19</sup><br>(2012)           | 149.5 U/L      | 0.75<br>(0.43-0.95)             | 0.70<br>(0.35-0.93)             | 2.50<br>(0.92-6.81)     | 0.36<br>(0.12-1.00)     | 0.77<br>(0.57-0.97)       |
| Younossi et al <sup>20</sup><br>(2008)       | 174 U/L        | 0.64<br>(0.41-0.83)             | 0.87<br>(0.74-0.95)             | 4.98<br>(2.21-11.22)    | 0.42<br>(0.24-0.73)     | 0.71<br>(0.59-0.81)       |
| Younossi et al <sup>21</sup><br>(2011)       | 273 U/L        | 0.72<br>(0.56-0.85)             | 0.64<br>(0.47-0.79)             | 2.02<br>(1.27-3.20)     | 0.43<br>(0.25-0.75)     | 0.71<br>(0.60-0.81)       |
| Pirvulescu et al <sup>22</sup><br>(2012)     | 136 U/L        | 0.70<br>(0.55-0.83)             | 0.62<br>(0.32-0.86)             | 1.83<br>(0.90-3.72)     | 0.48<br>(0.26-0.89)     | 0.77<br>(0.61-0.92)       |
| Shen JY et al <sup>24</sup><br>(2012)        | 338 U/L        | 0.68<br>(0.57-0.78)             | 0.45<br>(0.34-0.55)             | 1.23<br>(0.98-1.56)     | 0.71<br>(0.48-1.00)     | 0.70<br>(0.61-0.78)       |
| Yang et al <sup>26</sup><br>(2015)           | 17.75 ng/L     | 0.81<br>(0.70-0.89)             | 0.79<br>(0.71-0.86)             | 3.90<br>(2.66-5.72)     | 0.24<br>(0.15-0.40)     | 0.86<br>(NA)              |

PLR, positive likelihood ratio. NLR, negative likelihood ratio. CI, confidence interval. NA, not available.



**Table S2** Overview of six studies on CK-18 fragment M65 reporting the results in accuracy of diagnosis

| <b>Study (y)</b>                         | <b>Cut-off (U/L)</b> | <b>Sensitivity (95% CI)</b> | <b>Specificity (95% CI)</b> | <b>PLR (95% CI)</b>  | <b>NLR (95% CI)</b> | <b>AUROC (95% CI)</b> |
|------------------------------------------|----------------------|-----------------------------|-----------------------------|----------------------|---------------------|-----------------------|
| Yilmaz et al <sup>12</sup><br>(2007)     | 243.8 U/L            | 0.69<br>(0.53-0.82)         | 0.82<br>(0.66-0.92)         | 3.74<br>(1.86-7.51)  | 0.38<br>(0.24-0.60) | 0.74<br>(0.64-0.83)   |
| Shen J et al <sup>18</sup><br>(2012)     | 790 U/L              | 0.62<br>(0.50-0.74)         | 0.71<br>(0.59-0.80)         | 2.11<br>(1.43-3.12)  | 0.53<br>(0.38-0.75) | 0.71<br>(0.62-0.79)   |
| Joka et al <sup>19</sup><br>(2012)       | 386 U/L              | 1.00<br>(0.74-1.00)         | 0.80<br>(0.44-0.97)         | 4.23<br>(1.42-12.65) | 0.05<br>(0.01-0.77) | 0.93<br>(0.81-1.0)    |
| Younossi et al <sup>20</sup><br>(2008)   | 384 U/L              | 0.64<br>(0.41-0.83)         | 0.89<br>(0.77-0.96)         | 5.98<br>(2.46-14.52) | 0.41<br>(0.23-0.71) | 0.81<br>(0.70-0.90)   |
| Pirvulescu et al <sup>22</sup><br>(2012) | 389 U/L              | 0.70<br>(0.55-0.83)         | 0.69<br>(0.39-0.91)         | 2.28<br>(0.99-5.27)  | 0.43<br>(0.24-0.76) | 0.82<br>(0.71-0.94)   |
| Grigorescu et al <sup>23</sup><br>(2012) | 340 U/L              | 0.80<br>(0.67-0.89)         | 0.65<br>(0.41-0.85)         | 2.28<br>(1.24-4.19)  | 0.31<br>(0.17-0.57) | 0.79<br>(0.69-0.87)   |

PLR, positive likelihood ratio. NLR, negative likelihood ratio. CI, confidence interval.

**Table S3** Overview of 12 studies on FGF-21 reporting the results in means and standard deviations.

| Study (year)                            | NAFLD            |              |       |      |              |      | Control |              |       |
|-----------------------------------------|------------------|--------------|-------|------|--------------|------|---------|--------------|-------|
|                                         | Simple steatosis |              |       | NASH |              |      | N       | Mean (pg/ml) | SD    |
|                                         | N                | Mean (pg/ml) | SD    | N    | Mean (pg/ml) | SD   |         |              |       |
| Dushay et al <sup>29</sup><br>(2010)    | 6                | 770          | 290   | 9    | 250          | 80   | 6       | 30           | 10    |
| Li HT et al <sup>28</sup><br>(2010)     | 224              | 402.38       | 287.7 | NA   | NA           | NA   | 124     | 198.62       | 205.7 |
| Yilmaz et al <sup>27</sup><br>(2010)    | 82               | 200          | 108   | NA   | NA           | NA   | 77      | 93           | 81.5  |
| Dasarathy et al <sup>30</sup><br>(2011) | NA               | NA           | NA    | 10   | 189.7        | 36.3 | 16      | 114.8        | 17.6  |
| Li HT et al <sup>32</sup><br>(2013)     | 159              | 361.27       | 261   | NA   | NA           | NA   | 553     | 226.08       | 163.7 |
| Reinehr et al <sup>31</sup><br>(2012)   | 12               | 198          | 173   | NA   | NA           | NA   | 48      | 195          | 182   |
| Shen JY et al <sup>24</sup><br>(2012)   | 64               | 248          | 67    | 82   | 334          | 112  | 74      | 104          | 67.4  |
| Yilmaz and Eren <sup>25</sup><br>(2012) | NA               | NA           | NA    | 60   | 228.5        | 50   | 76      | 83           | 47    |
| Alisi et al <sup>35</sup><br>(2013)     | 52               | 89           | 18.6  | 32   | 54           | 12.8 | 23      | 196          | 34.1  |
| Giannini et al <sup>34</sup><br>(2013)  | 186              | 206          | 14.5  | NA   | NA           | NA   | 31      | 99           | 12    |
| Shen Y et al <sup>33</sup><br>(2013)    | 27               | 321.5        | 178.1 | NA   | NA           | NA   | 47      | 256.1        | 149.1 |
| Yang et al <sup>26</sup><br>(2015)      | 111              | 21.4         | 17.1  | 68   | 56.8         | 15.6 | 91      | 16.6         | 13.9  |

SD, standard deviations. NA, not available.

**Table S4** Overview of seven studies on CBP reporting the results in accuracy of diagnosis

| <b>Study (y)</b>                         | <b>Markers</b>                            | <b>Sensitivity<br/>(95% CI)</b> | <b>Specificity<br/>(95% CI)</b> | <b>PLR<br/>(95% CI)</b> | <b>NLR<br/>(95% CI)</b> | <b>AUROC<br/>(95% CI)</b> |
|------------------------------------------|-------------------------------------------|---------------------------------|---------------------------------|-------------------------|-------------------------|---------------------------|
| Younossi et al <sup>20</sup><br>(2008)   | CK-18<br>Adiponectin<br>Resistin          | 0.96<br>(0.80-1.00)             | 0.73<br>(0.58-0.85)             | 3.60<br>(2.20-5.88)     | 0.05<br>(0.01-0.3)      | 0.91<br>(0.81-0.96)       |
| Younossi et al <sup>21</sup><br>(2011)   | CK-18<br>BMI<br>Triglycerides             | 0.93<br>(0.80-0.98)             | 0.46<br>(0.30-0.63)             | 1.72<br>(1.27-2.33)     | 0.16<br>(0.05-0.51)     | 0.81<br>(0.70-0.89)       |
| Shen JY et al <sup>24</sup><br>(2012)    | CK-18<br>FGF21<br>AFABP                   | 0.96<br>(0.89-0.99)             | 0.91<br>(0.82-0.97)             | 10.74<br>(5.00-23.08)   | 0.04<br>(0.01-0.13)     | 0.71<br>(0.63-0.79)       |
| Grigorescu et al <sup>23</sup><br>(2012) | CK-18<br>IL-6<br>Adiponectin              | 0.85<br>(0.73-0.93)             | 0.85<br>(0.62-0.97)             | 5.65<br>(1.98-16.13)    | 0.18<br>(0.10-0.34)     | 0.90<br>(0.82-0.96)       |
| Yilmaz and Eren <sup>25</sup><br>(2012)  | CK-18<br>FGF-21<br>Osteoprotegerin        | 0.95<br>(0.86-0.99)             | 0.86<br>(0.76-0.93)             | 6.56<br>(3.79-11.37)    | 0.06<br>(0.02-0.18)     | NA                        |
| Pirvulescu et al <sup>22</sup><br>(2012) | CK-18, BMI, ALT,<br>AST and<br>HOMA-IR    | 0.89<br>(0.77-0.96)             | 0.92<br>(0.64-1.00)             | 11.62<br>(1.76-76.56)   | 0.12<br>(0.05-0.27)     | 0.96                      |
| Yang et al <sup>26</sup><br>(2015)       | CK-18, FGF-21,<br>IL-1Ra, PEDF and<br>OPG | 0.90<br>(0.80-0.96)             | 0.95<br>(0.89-0.98)             | 16.60<br>(7.59-36.29)   | 0.11<br>(0.05-0.22)     | NA                        |

PLR, positive likelihood ratio. NLR, negative likelihood ratio. CI, confidence interval. NA, not available.

**Table S5** Overview of cross-study heterogeneity evaluated by  $I^2$  analysis

| <b>Biomarker</b> | <b><math>I^2</math></b> |                    |                    |            |            |        |
|------------------|-------------------------|--------------------|--------------------|------------|------------|--------|
|                  | <b>Diagnostic score</b> | <b>Sensitivity</b> | <b>Specificity</b> | <b>PLR</b> | <b>NLR</b> |        |
| CK-18            | M30                     | 79.40%             | 61.79%             | 85.74%     | 80.94%     | 71.03% |
|                  | M65                     | 42.89%             | 52.82%             | 43.52%     | 0.00%      | 38.13% |
| FGF-21           |                         | 74.34%             | 81.09%             | 82.51%     | 39.10%     | 76.62% |
| CBP              |                         | 61.40%             | 28.12%             | 88.99%     | 86.08%     | 25.98% |

PLR, positive likelihood ratio. NLR, negative likelihood ratio
